# Supplementary material for: Complement activation contributes to perioperative neurocognitive disorders in mice
Source: Springer Nature journal article supplement (doi:10.1186/s12974-018-1292-4), 2018-09-04

**C3**

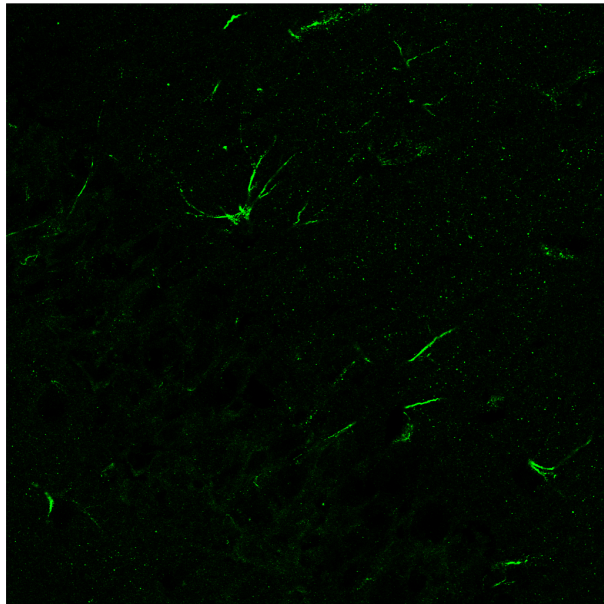

**NeuN**

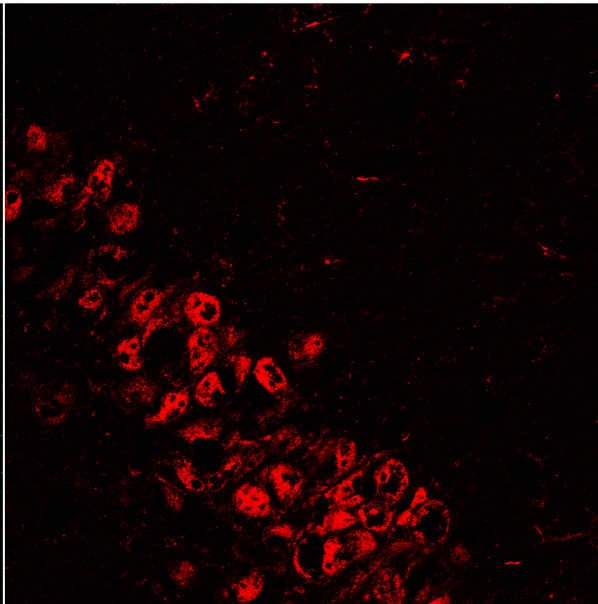

**Merge**

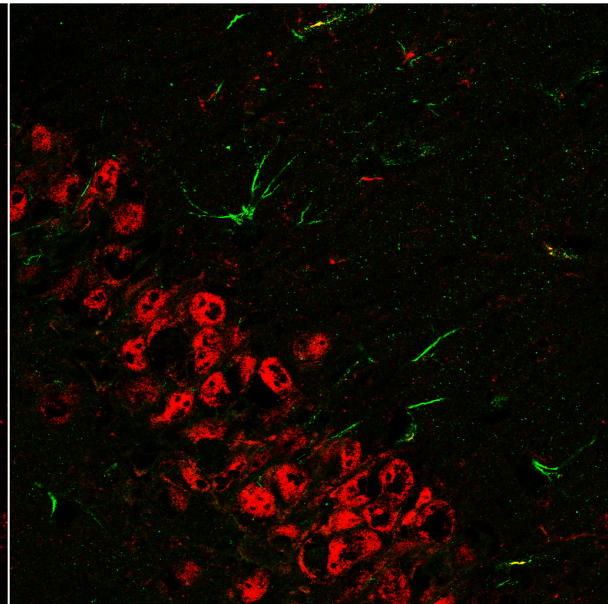

Supplement: MOESM1 [file 16097028]
